# Supplementary material for: Protein–metal ion networks coated carbon matrix as a precursor: to construct carbon-supported Mo-based catalysts with highly exposed active sites for hydrogenation of nitro compounds
Source: Royal Society of Chemistry journal article supplement (doi:10.1039/d4nj00861h), 2024-01-01
Supplement: d4nj00861h1.pdf [file d4nj00861h1.pdf]

## Supplementary Information

### **Protein-Metal Ions Networks Coated Carbon Matrix as a Precursor: To Construct Carbon-Supported Mo-based Catalyst with Highly Exposed Active Site for Hydrogenation of Nitro Compounds**

Lizhen Lian <sup>a,b</sup>, Guangji Zhang <sup>a,c</sup>, Xiaojun Zhao <sup>a</sup>, Jianhan Huang <sup>a</sup>, Liqiang Wang <sup>\*,b,c</sup> and You-Nian Liu <sup>\*,a</sup>

<sup>a</sup> Hunan Provincial Key Laboratory of Micro & Nano Materials Interface Science, College of Chemistry and Chemical Engineering, Central South University, Changsha, Hunan 410083, China.

<sup>b</sup> Henan Province Industrial Technology Research Institute of Resources and Materials, School of Material Science and Engineering, Zhengzhou University, Zhengzhou, Henan 450001, China

<sup>c</sup> State Key Laboratory of Biobased Material and Green Papermaking, Qilu University of Technology, Shandong Academy of Sciences, Jinan, Shandong 250353, China

## Figures and tables

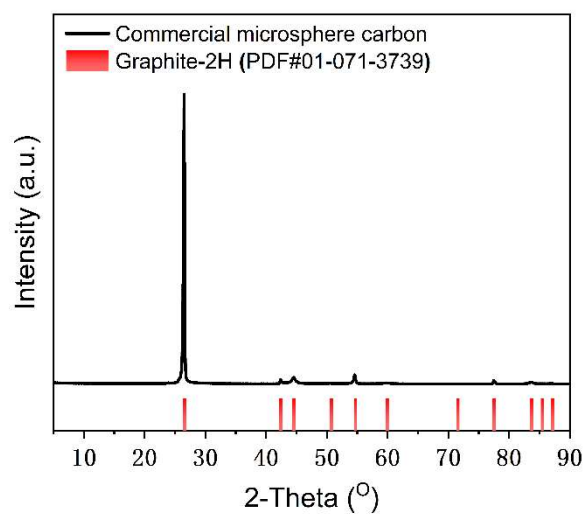

**Fig. S1** XRD pattern of the pure commercial microsphere carbon (MC) support.

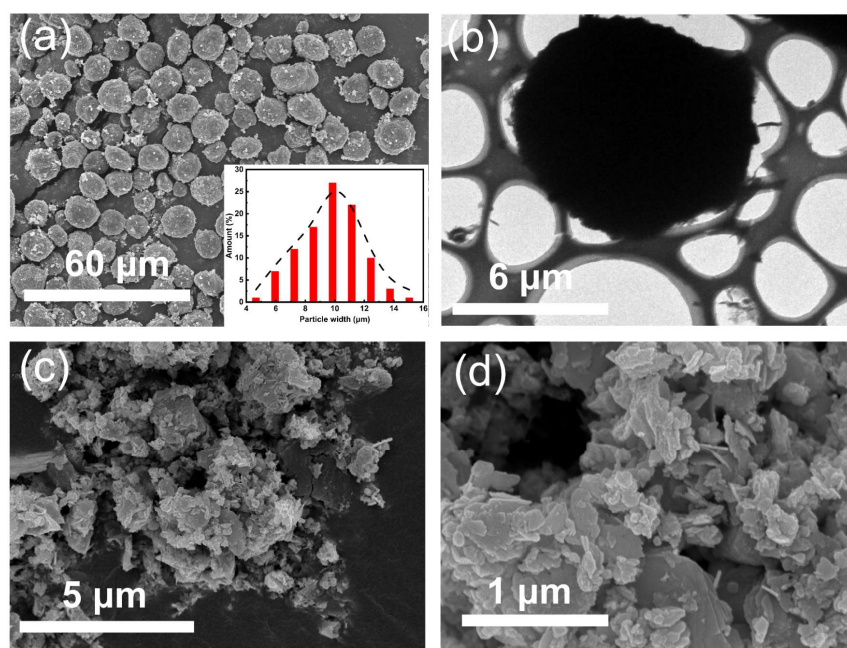

**Fig. S2** SEM image and particle width distribution of commercial microsphere carbon support (a). TEM image of Mo@C/MC catalyst (b). SEM images of Mo@C catalysts (c,d).

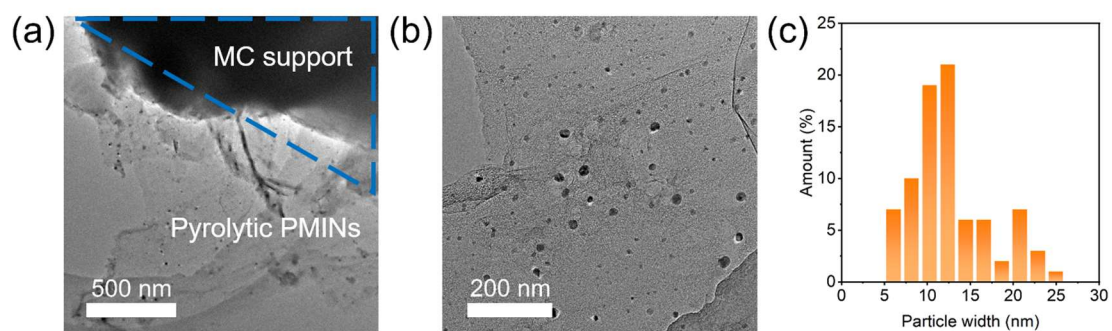

**Fig. S3** TEM images of the edge of Mo@C/MC catalyst (a, b) and particle width distribution of Mo@C/MC catalysts (c).

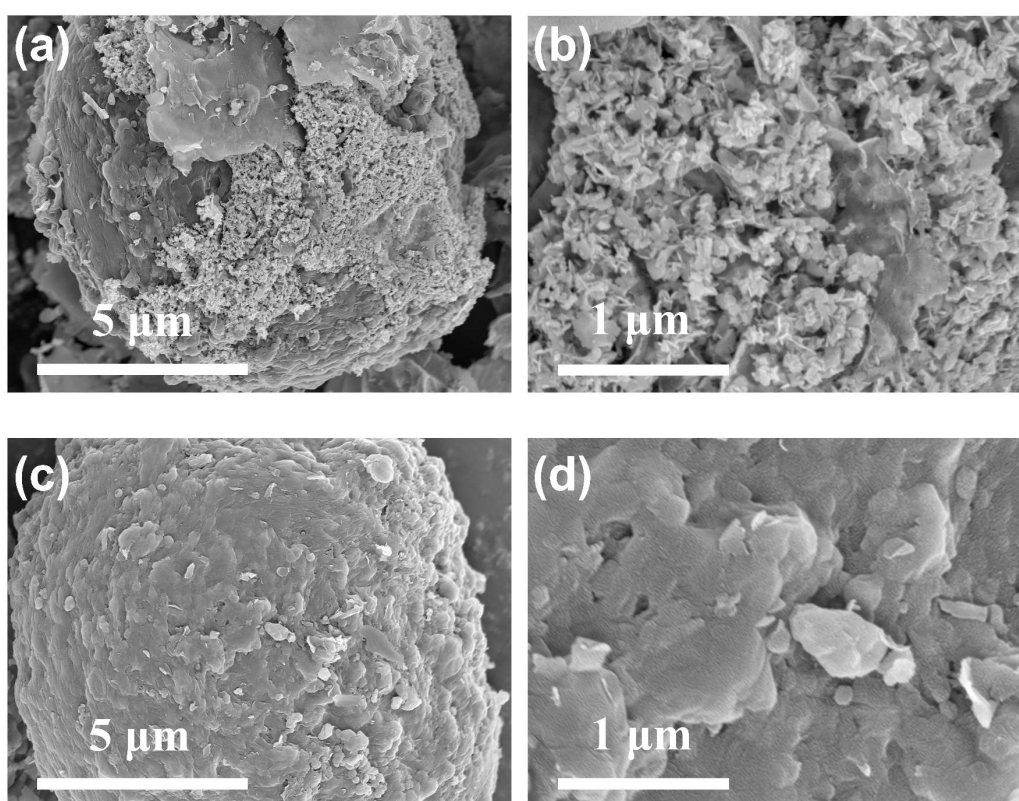

**Fig. S4** SEM image of Mo@C/MC catalyst (a, b) and Mo/MC catalyst (c,d).

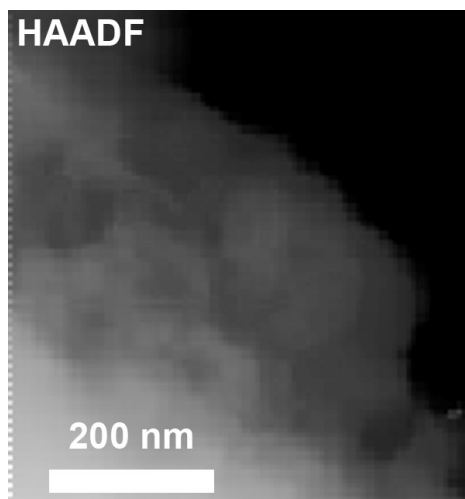

**Fig. S5** HAADF image of Mo@C/MC catalyst.

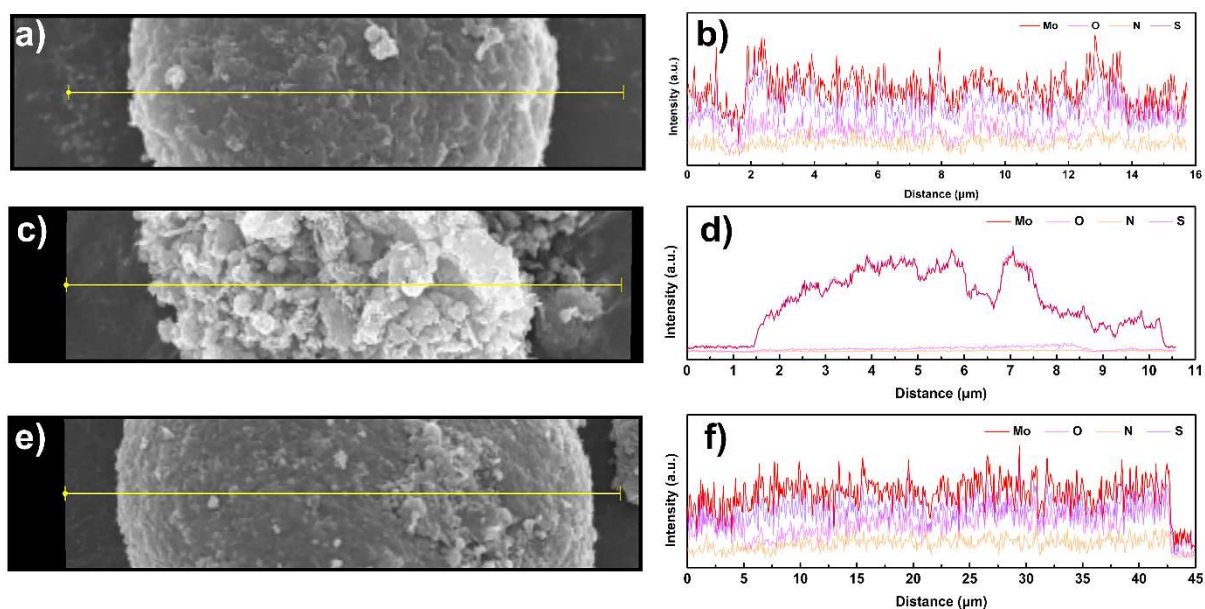

**Fig. S6** Line scan EDS image of Mo@C/MC (a, b), Mo@C (c, d) and Mo/MC (e, f) catalysts.

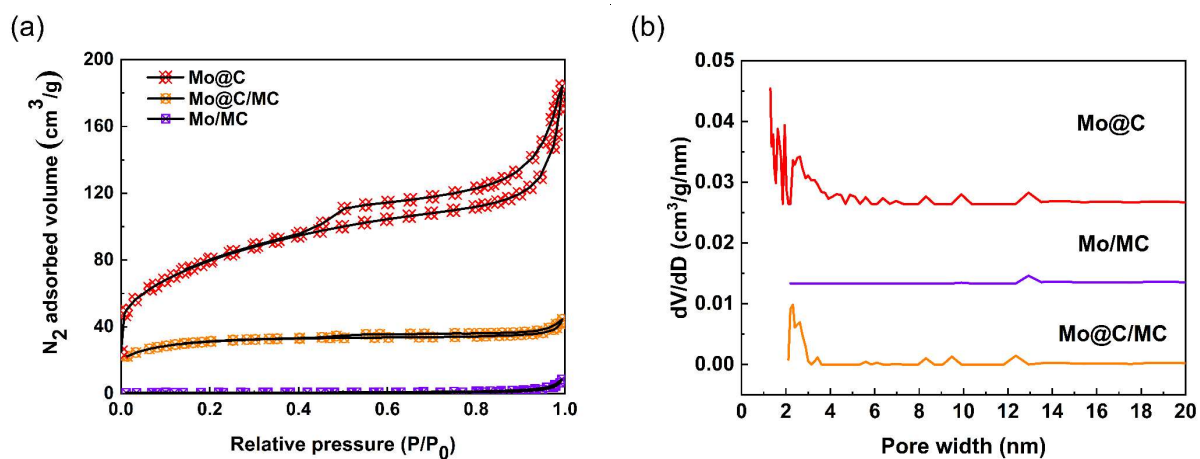

**Fig. S7** Nitrogen adsorption and desorption isotherms (a) and pore size distribution (b) of three catalysts.

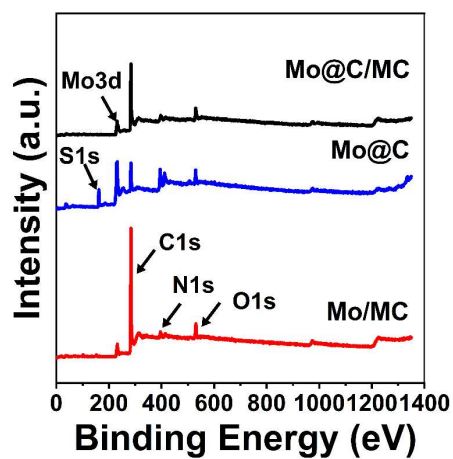

**Fig. S8** XPS survey scan of Mo@C/MC, Mo@C and Mo/MC catalysts.

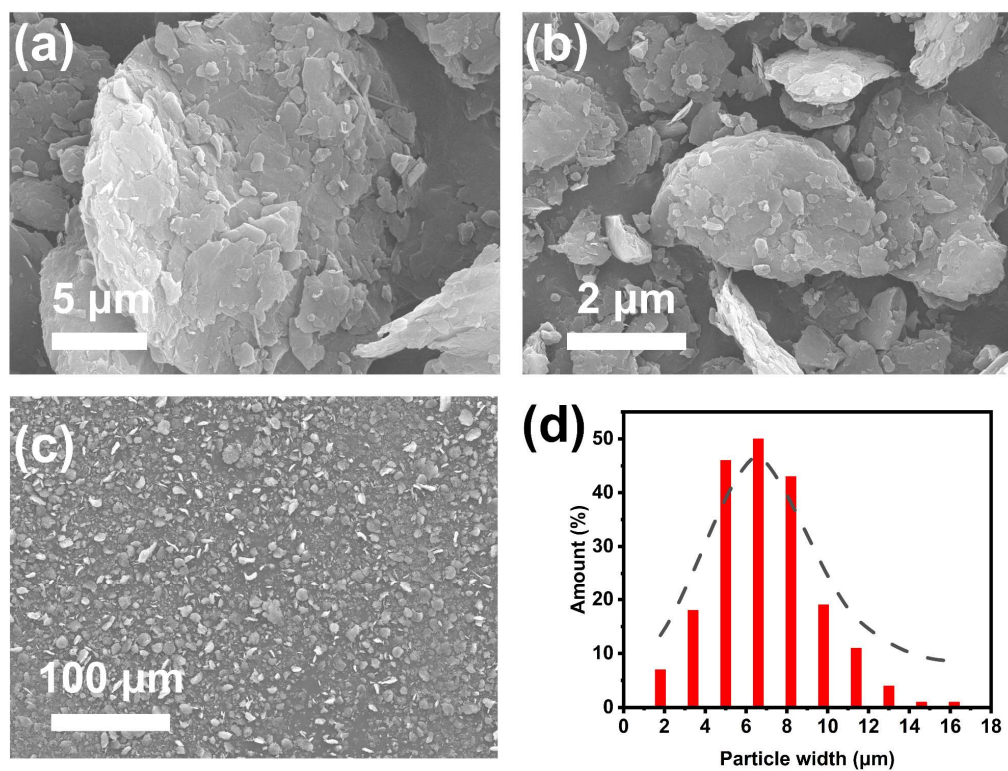

**Fig. S9** SEM images of Mo@C/MC catalyst after ball milling (a, b and c) and its particle width distribution (d).

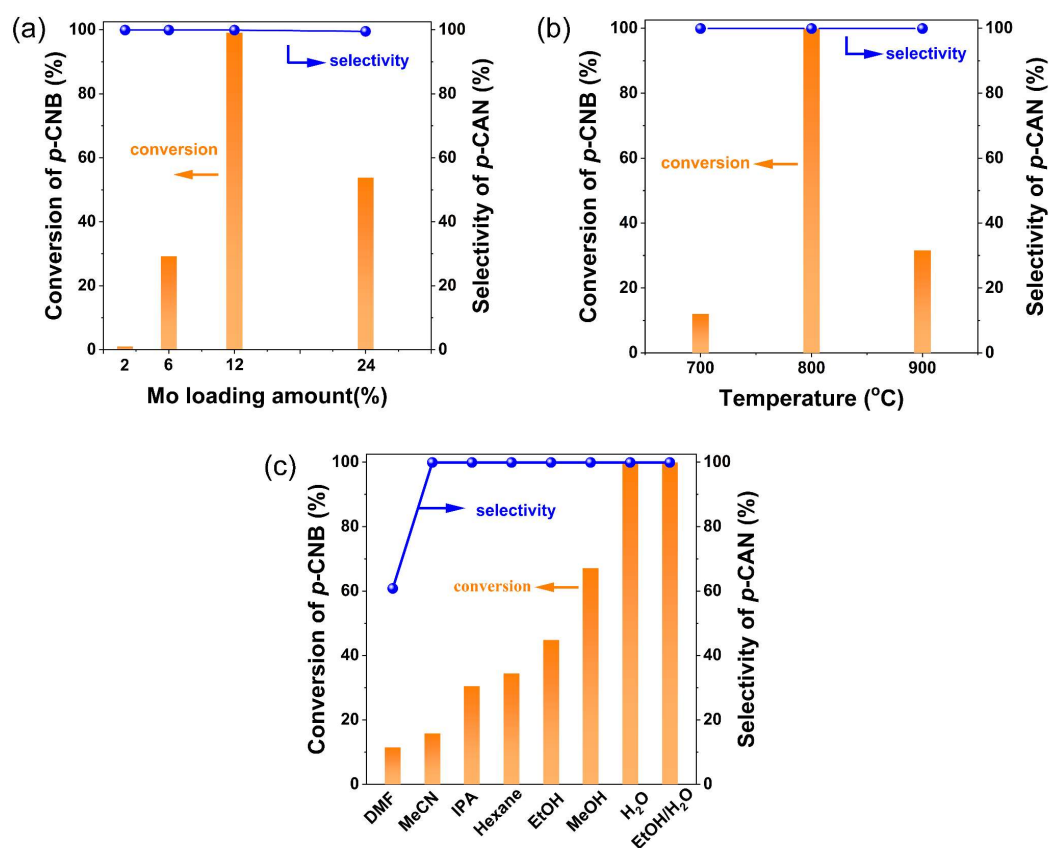

**Fig. S10** Impact of Mo amount (a), calcination temperature (b) and solvent (c) on the hydrogenation of *p*-CNB. Reaction conditions: 0.25 mmol *p*-CNB in 5 mL ethanol/H<sub>2</sub>O (V/V = 1:4) with 50 mg catalyst reacted at 100 °C, 5 bar H<sub>2</sub> for 3 h. The identity of the products was further determined by HPLC.

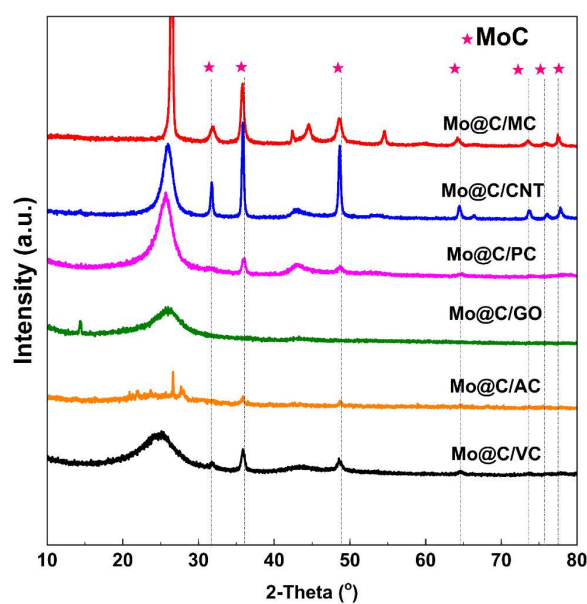

**Fig. S11** XRD pattern of different types of protein-coated carbon matrices (including carbon

nanotubes (CNTs), graphite oxide (GO), porous carbon (PC), activated carbon (AC), and Vulcan XC72 (VC)). (MoC pattern PDF#03-065-6664)

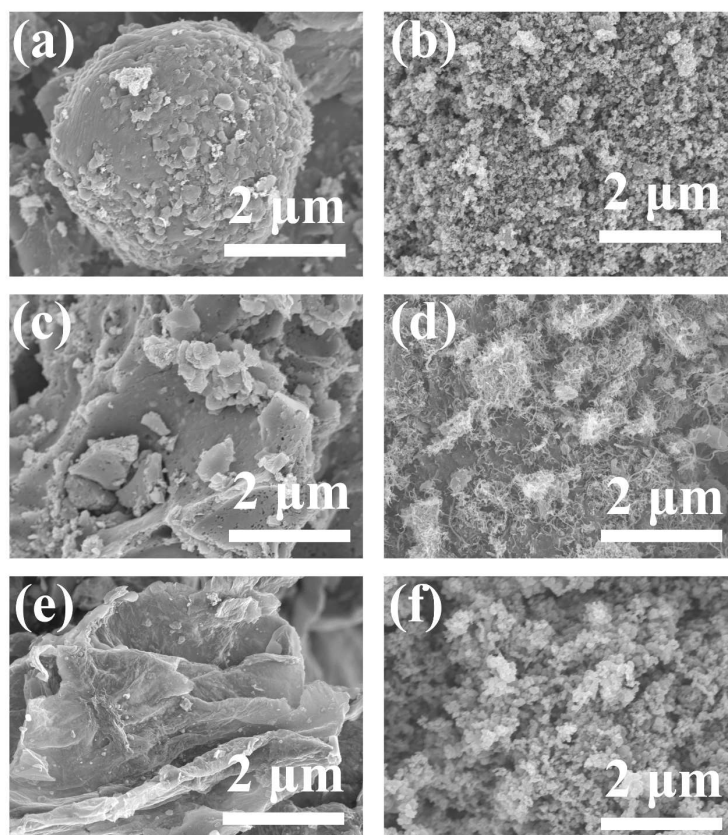

**Fig. S12** SEM image of Mo@C/MC (a), Mo@C/VC (b), Mo@C/AC (c), Mo@C/CNTs (d), Mo@C/GO (e), Mo@C/PC (f) catalyst.

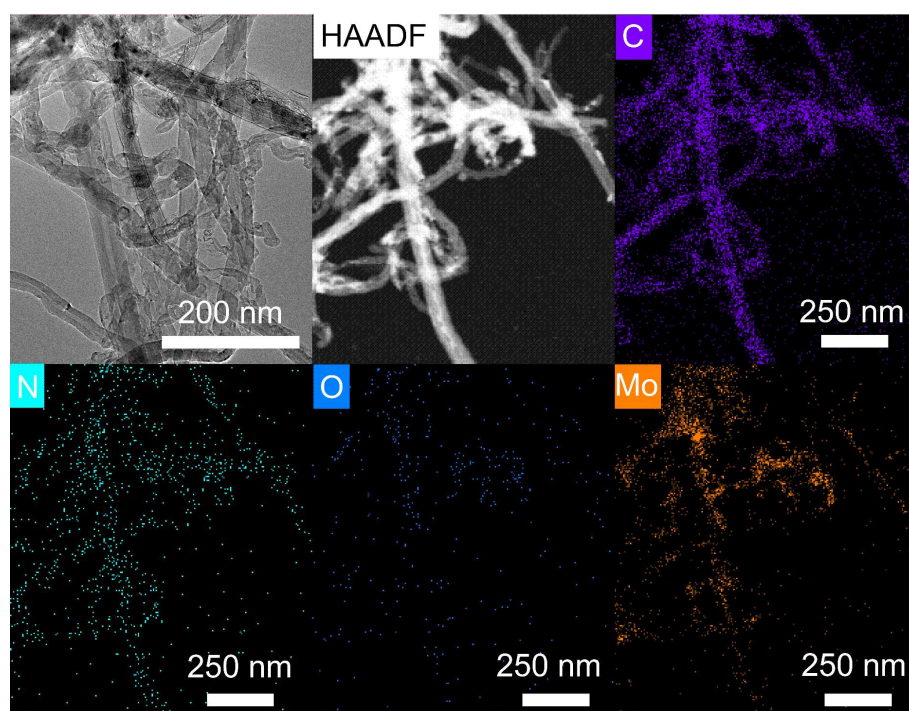

**Fig. S13** TEM and mapping profiles of the Mo@C/CNTs catalyst.

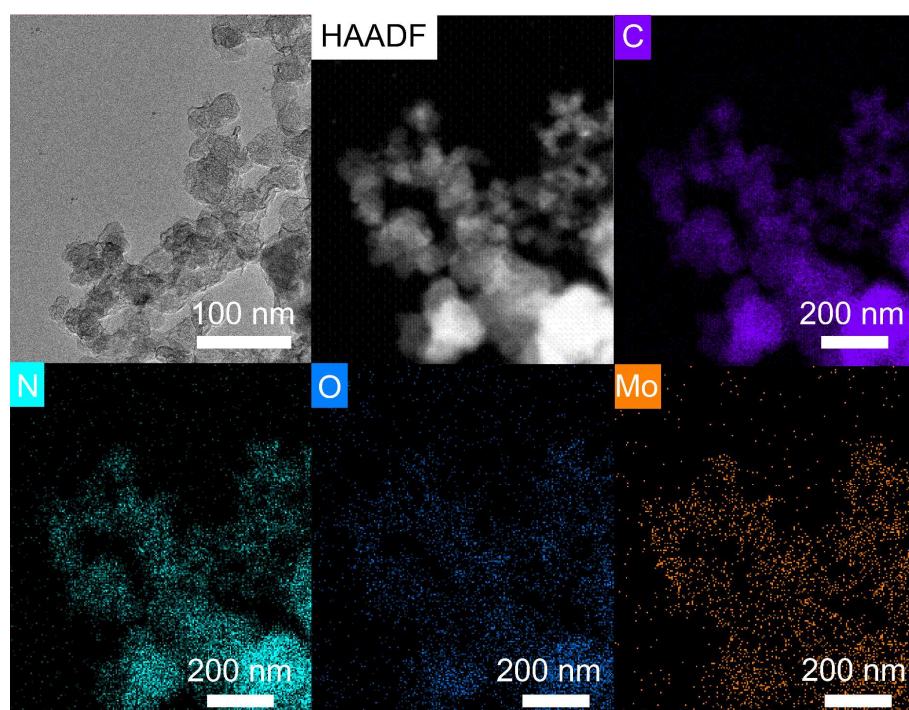

**Fig. S14** TEM and mapping profiles of the Mo@C/PC catalyst

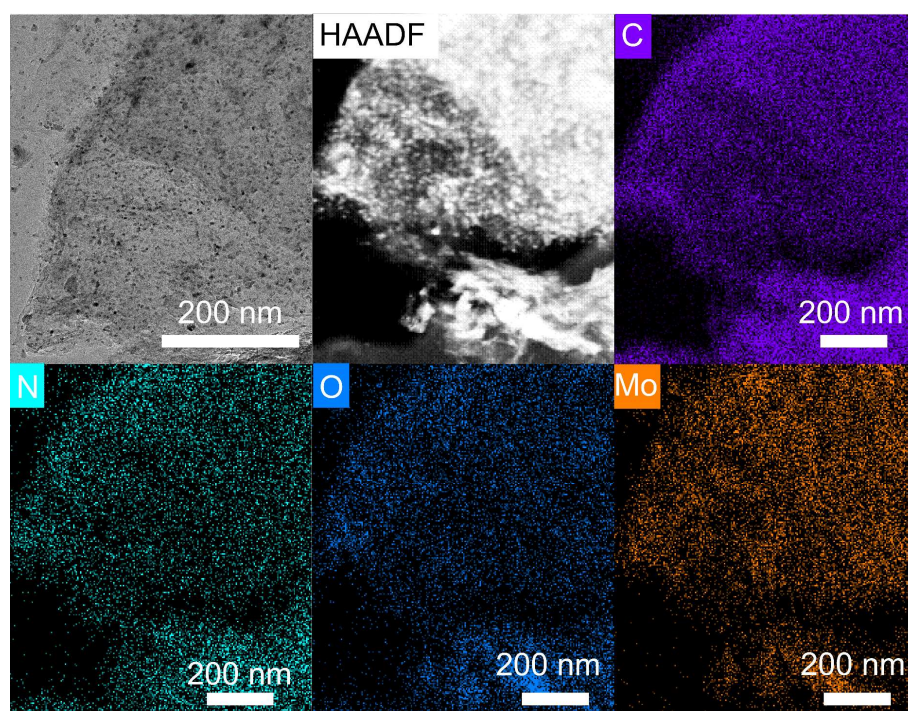

**Fig. S15** TEM and mapping profiles of the Mo@C/GO catalyst

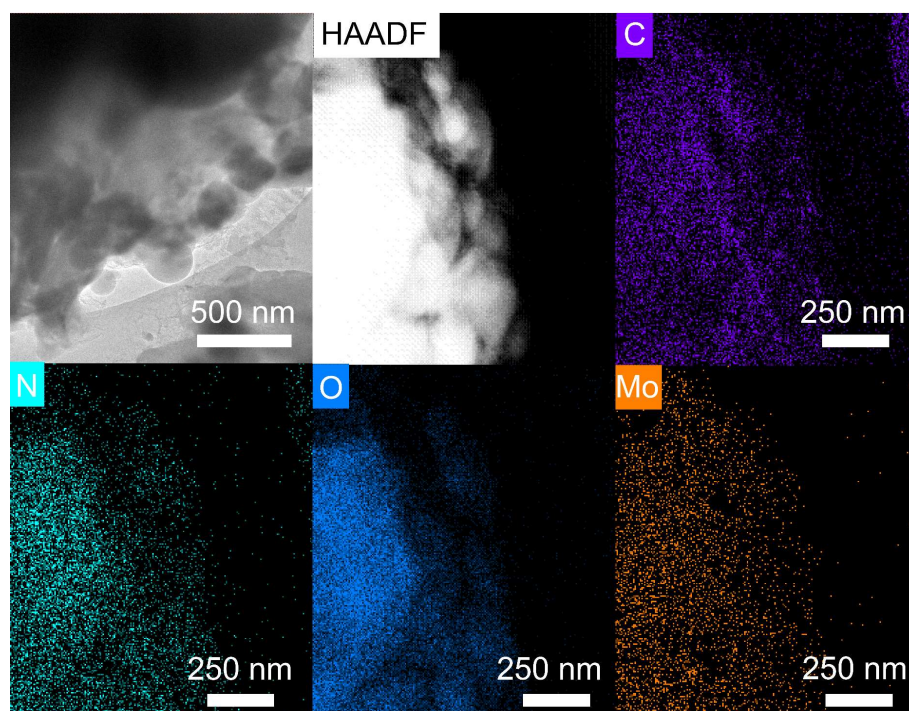

**Fig. S16** TEM and mapping profiles of the Mo@C/AC catalyst

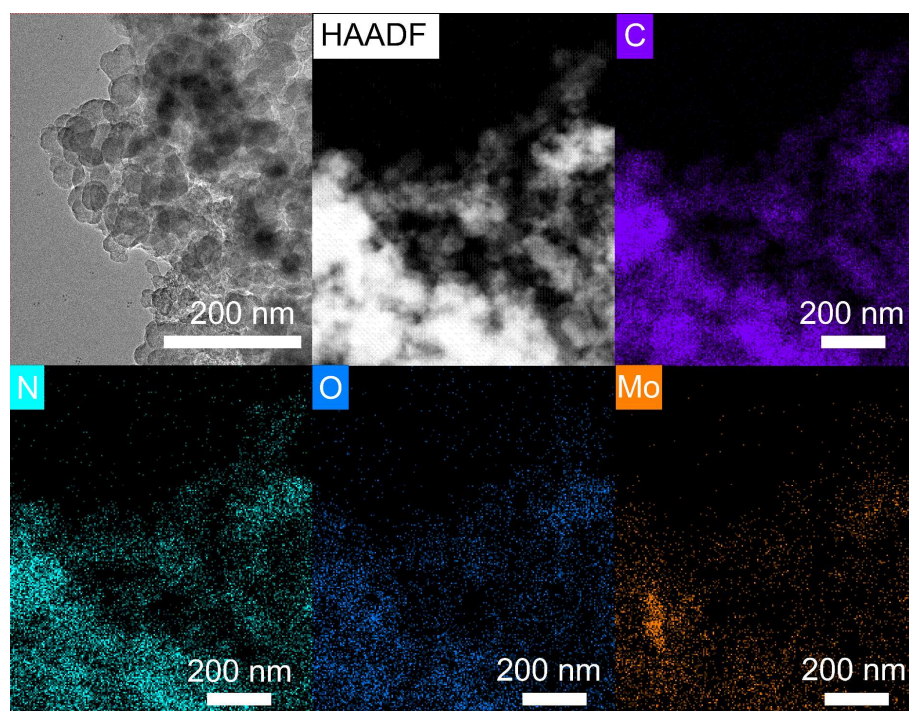

**Fig. S17** TEM and mapping profiles of the Mo@C/VC catalyst

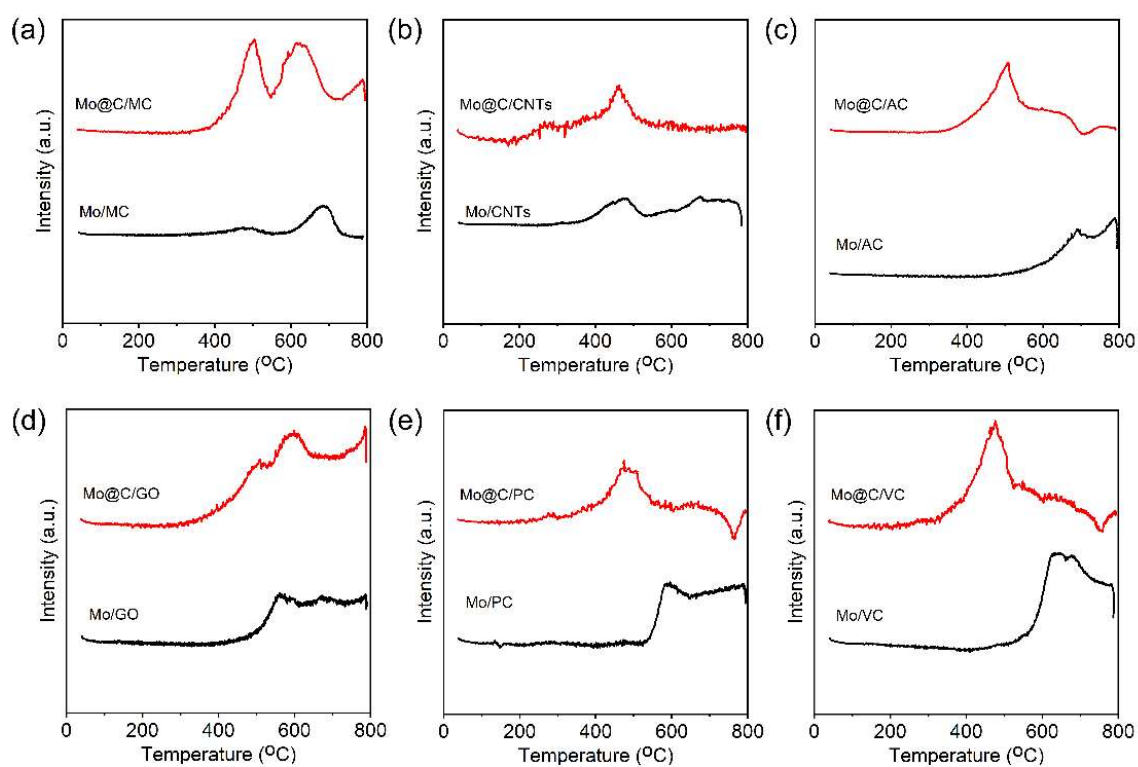

**Fig. S18** H<sub>2</sub>-TPR profiles of the catalysts containing different carbon matrices

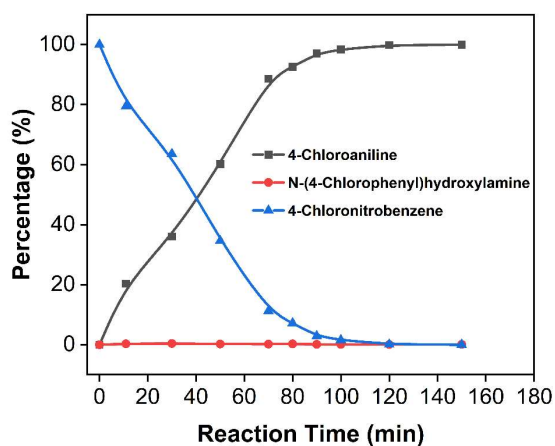

**Fig. S19** The yields of *p*-CNB and *p*-CAN upon Mo@C/MC catalyst. Reaction conditions: 0.25 mmol *p*-CNB in 5 mL ethanol/H<sub>2</sub>O (V/V = 1: 4) with 50 mg catalyst reacted at 100 °C, 5 bar H<sub>2</sub> for 3 h. The identity of the products was further determined by HPLC.

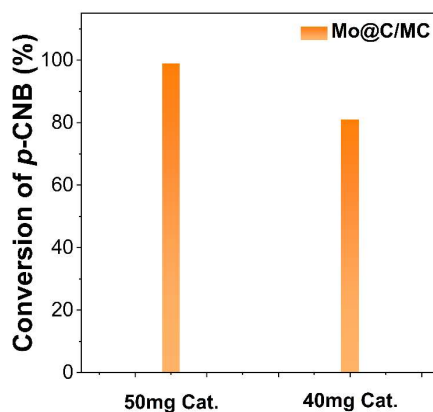

**Fig. S20** Catalyst usage on Mo@C /MC. Reaction conditions: 0.25 mmol *p*-CNB in 5 mL ethanol/H<sub>2</sub>O (V/V = 1:4) with catalyst reacted at 100 °C, 5 bar H<sub>2</sub> for 3 h. The identity of the products was further determined by HPLC.

**Table S1** Properties of the catalysts.

| Catalyst | $S_{\text{BET}}/\text{m}^2 \text{ g}^{-1}$ | $V_{\text{Total}}/\text{cm}^3 \text{ g}^{-1}$ | $D_{\text{p}}/\text{nm}$ | $V_{\text{Micro}}/\text{cm}^3 \text{ g}^{-1}$ | $V_{\text{ultra}}/\text{cm}^3 \text{ g}^{-1}$ |
|----------|--------------------------------------------|-----------------------------------------------|--------------------------|-----------------------------------------------|-----------------------------------------------|
| Mo@C/MC  | 116                                        | 0.07                                          | 2.04                     | 0.02                                          | 0.03                                          |
| Mo@C     | 287                                        | 0.28                                          | 3.25                     | 0.01                                          | 0.25                                          |
| Mo/MC    | 3                                          | 0.01                                          | 7.98                     | 0                                             | 0.01                                          |

**Table S2** Element amount of the catalysts by XPS.

| Catalyst | Atomic % |       |       |      |      |
|----------|----------|-------|-------|------|------|
|          | C        | N     | O     | S    | Mo   |
| Mo@C/MC  | 86.87    | 5.05  | 6.51  | 0.23 | 1.34 |
| Mo@C     | 49.39    | 11.35 | 33.97 | 1.66 | 3.64 |
| Mo/MC    | 86.28    | 4.35  | 7.4   | 0.31 | 1.66 |

**Table S3** The relative content of Mo species in the catalysts determined by XPS.

| Catalyst          | $\text{Mo}^{4+}(\text{area } \%)$ | $\text{Mo}^{6+}(\text{area } \%)$ |
|-------------------|-----------------------------------|-----------------------------------|
| Mo@C/MC           | 83.5                              | 16.5                              |
| Mo@C <sup>a</sup> | 56.9                              | 27.6                              |
| Mo/MC             | 26.2                              | 73.8                              |

<sup>a</sup> The total area of the Mo@C including 15.5% of S1s , 56.9% of  $\text{Mo}^{4+}$ , and 27.6% of  $\text{Mo}^{6+}$ .

**Table S4** Investigation of Mo amount before and after ball milling treatment.

| Catalyst | Total Mo amount <sup>c</sup> /%       | Mo amount at surface <sup>d</sup> /% |
|----------|---------------------------------------|--------------------------------------|
| Mo@C/MC  | 4.7 <sup>a</sup> / 4.6 <sup>b</sup>   | 1.3 <sup>a</sup> / 0.5 <sup>b</sup>  |
| Mo@C     | 29.2 <sup>a</sup> / 30.8 <sup>b</sup> | 3.6 <sup>a</sup> / 4.0 <sup>b</sup>  |

<sup>a</sup> The data was measured using raw samples that have not been ball milled,

<sup>b</sup> The data was measured using processed samples with ball milling at the condition of 500 r/min and 8 h using a 50 mL agate jar by the Planetary Ball Mill instrument.

<sup>c</sup> The data was detected by ICP-OES.

<sup>d</sup> The data was detected by XPS.

**Table S5** Investigation of surface Mo distribution before and after ball milling treatment.

| Catalyst | Surface distribution <sup>a</sup> /% |                    |
|----------|--------------------------------------|--------------------|
|          | Before ball milling                  | After ball milling |
| Mo@C/MC  | 27.7                                 | 10.9               |
| Mo@C     | 12.3                                 | 13.0               |

<sup>a</sup> Data was obtained using Mo amount detected from XPS result divided by that from ICP-OES result.

**Table S6** Investigation of surface Mo dispersion before and after ball milling treatment by CO-pulse adsorption.

| Catalyst | Metal dispersion /%                | Metal surface area /m <sup>2</sup> g <sup>-1</sup> | Average particle diameter /nm        |
|----------|------------------------------------|----------------------------------------------------|--------------------------------------|
| Mo@C/MC  | 6.4 <sup>a</sup> /6.3 <sup>b</sup> | 29.5 <sup>a</sup> /28.9 <sup>b</sup>               | 19.9 <sup>a</sup> /20.3 <sup>b</sup> |
| Mo@C     | 2.4 <sup>a</sup> /2.7 <sup>b</sup> | 3.3 <sup>a</sup> /3.7 <sup>b</sup>                 | 53.4 <sup>a</sup> /47.1 <sup>b</sup> |

<sup>a</sup> The data was measured using raw samples that have not been ball milled

<sup>b</sup> The data was measured using processed samples with ball milling at 500 r/min for 8 h using a 50 mL agate jar by the Planetary Ball Mill instrument.

**Table S7** Catalytic performance of *p*-CNB hydrogenation with different amount of protein-Mo networks<sup>a</sup>

| 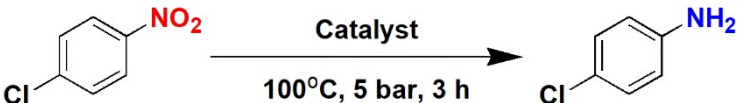 |                      |           |          |
|--------------------------------------------------------------------------------------|----------------------|-----------|----------|
| Entry                                                                                | Catalyst             | Conv. (%) | Sel. (%) |
| 1                                                                                    | Mo@C/MC              | >99       | >99      |
| 2                                                                                    | Mo@C/MC <sup>b</sup> | 57.5      | 99       |
| 3                                                                                    | Mo@C                 | 12        | 99       |

<sup>a</sup> Reaction conditions: 0.25 mmol *p*-CNB in 5 mL ethanol/H<sub>2</sub>O (V/V = 1:4) with 50 mg catalyst reacted at 100 °C, 5 bar H<sub>2</sub> for 3 h.

<sup>b</sup> The catalyst was prepared by reducing the amount of protein-Mo networks (Na<sub>2</sub>MoO<sub>4</sub>·2H<sub>2</sub>O: 150 mg and egg white: 3.5 g).

**Table S8** Properties of the catalysts with different types of protein-coated carbon matrices.

| Catalyst  | $S_{\text{BET}}/\text{m}^2 \text{ g}^{-1}$ | $V_{\text{Total}}/\text{cm}^3 \text{ g}^{-1}$ | $D_{\text{p}}/\text{nm}$ |
|-----------|--------------------------------------------|-----------------------------------------------|--------------------------|
| Mo@C/PC   | 90                                         | 0.23                                          | 5.39                     |
| Mo@C/VC   | 108                                        | 0.24                                          | 4.92                     |
| Mo@C/CNTs | 58                                         | 0.30                                          | 12.8                     |
| Mo@C/GO   | 16                                         | 0.03                                          | 4.99                     |
| Mo@C/AC   | 41                                         | 0.06                                          | 5.63                     |

**Table S9** The carbon yield of catalysts <sup>a</sup>.

| Catalyst | Carbon yield/ % |
|----------|-----------------|
| Mo@C/MC  | 56.0%           |
| Mo@C     | 26.7%           |

<sup>a</sup> Data was obtained using mass detected from the dry catalyst after pyrolysis divided by that from the fresh dry precursor.

**Table S10** Investigation of Mo amount before and after reaction <sup>a</sup>.

| Catalyst | Total Mo amount/% |                |
|----------|-------------------|----------------|
|          | Before reaction   | After reaction |
| Mo@C/MC  | 4.7%              | 4.1%           |

<sup>a</sup> The data was detected by ICP-OES.
